# Supplementary material
Source: PubMed Central journal article supplement (PMC1299266)
Supplement: 6-7400356s1.pdf [file 6-7400356s1.pdf]

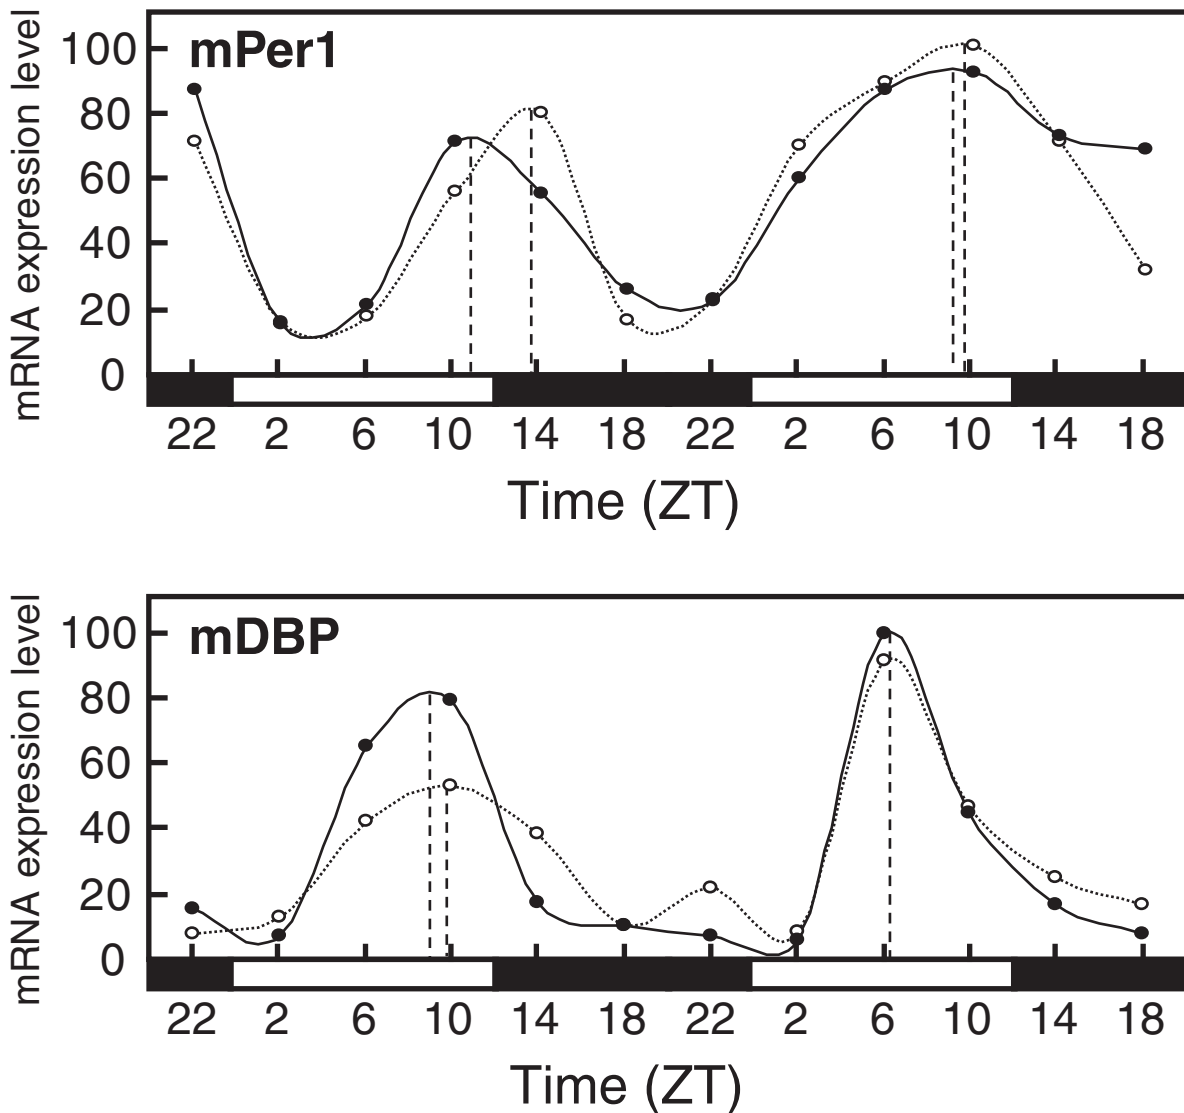

**Figure S1.** The Phase Shifts by PGE<sub>2</sub> Disappear in the Second Light-dark Cycle. Intraperitoneal administration of PGE<sub>2</sub> (solid line) or PBS alone (dotted line) was performed at ZT21. After the injection, mouse was killed and mRNA was collected from liver at each time point over two days. The mRNA expression levels of mPer1 and mDBP were evaluated by real-time quantitative PCR. Each value was normalized to mG3PDH.
